# Supplementary material for: Resilience of Terraced Landscapes to Human and Natural Impacts: A GIS-Based Reconstruction of Land Use Evolution in a Mediterranean Mountain Valley
Source: MDPI journal article supplement (doi:10.3390/land13050592), 2024-04-29
Supplement: s1 [file s1]

**Table S1: Population of the main municipalities of the Roya Valley 1793-2017 (number of inhabitants).** Source: cassini.ehess.fr, Wagner 1865, Insee, Enciclopedia Treccani (Tende and La Brigue, 1936). Realization M. Cohen

| Year | Sospel | Moulinet | Breil-sur-Roya | Saorge | Fontan | Tende | La Brigue |
|------|--------|----------|----------------|--------|--------|-------|-----------|
| 1793 | 2453   | 702      | 932            | 3100   |        | 1500  | 3100      |
| 1800 | 2990   | 826      | 1419           | 1720   |        | 1491  | 2895      |
| 1806 | 3307   | 877      | 1511           | 1954   |        | 1654  | 2759      |
| 1821 | 3620   | 1029     | 1969           | 2197   |        | 2057  | 3300      |
| 1836 | 4394   | 405      | 2392           | 2689   |        | 2441  | 3729      |
| 1846 | 4437   | 1202     | 2637           | 3037   |        | 2659  | 4047      |
| 1856 | 3818   | 1139     | 2458           | 2685   |        |       |           |
| 1861 | 3936   | 1172     | 2706           | 3356   |        |       |           |
| 1866 | 3912   | 1130     | 2709           | 3180   |        | 2900  | 4000      |
| 1865 |        |          |                | 1990   | 1040   |       |           |
| 1872 | 3547   | 1065     | 2595           | 1692   | 1194   | 3200  | 4800      |
| 1876 | 3465   | 865      | 2576           | 1514   | 1074   | 1903  | 4047      |
| 1881 | 3425   | 940      | 2538           | 1528   | 1205   |       |           |
| 1886 | 3695   | 936      | 2565           | 1521   | 1135   |       |           |
| 1891 | 3887   | 813      | 2696           | 1319   | 1158   |       |           |
| 1896 | 3756   | 801      | 2668           | 1214   | 1162   |       |           |
| 1901 | 3570   | 928      | 2728           | 1094   | 1184   |       |           |
| 1906 | 3768   | 949      | 2645           | 1089   | 1079   |       |           |
| 1911 | 3529   | 938      | 2804           | 954    | 964    |       |           |
| 1921 | 3361   | 624      | 5136           | 988    | 1441   |       |           |
| 1926 | 3070   | 606      | 2899           | 658    | 1021   |       |           |
| 1931 | 3705   | 560      | 2666           | 631    | 860    |       |           |
| 1936 | 3815   | 547      | 2562           | 558    | 731    | 2536  | 2026      |
| 1946 | 2156   | 332      | 1321           | 460    | 499    | 2158  | 1145      |
| 1954 | 2181   | 350      | 2029           | 588    | 523    | 2080  | 768       |
| 1962 | 2321   | 286      | 1994           | 520    | 437    | 1954  | 687       |
| 1968 | 2582   | 265      | 2148           | 508    | 326    | 2053  | 582       |
| 1975 | 1828   | 220      | 2089           | 330    | 257    | 1951  | 493       |
| 1982 | 2171   | 164      | 2095           | 322    | 253    | 1954  | 495       |
| 1990 | 2502   | 193      | 2058           | 362    | 230    | 2098  | 618       |
| 1999 | 2885   | 249      | 2028           | 396    | 234    | 1844  | 595       |
| 2000 | 3394   | 252      |                |        | 341    |       |           |
| 2006 |        | 235      | 2092           | 431    | 297    | 2025  | 630       |
| 2017 | 3803   |          | 2158           | 459    |        | 2178  | 700       |

**Table S2:** Economy of the County of Nice and the municipalities of Tende and La Brigue during the 19<sup>th</sup> century [43]. Realization: M. Cohen

| Land-use in ha               | 1801 [Fodéré]                     | 1833 [loi sarde] | 1846 [Durante] | 1856 [A.Niel] | 1866-67 Forest Inv | Guiot 1874                                      |
|------------------------------|-----------------------------------|------------------|----------------|---------------|--------------------|-------------------------------------------------|
| Wood                         |                                   | 20,241           | 24,680         | 28,204        | 57061              | 50000 [Tende 7000; La Brigue 4000; Cairos 1156] |
| Pasture                      |                                   |                  | 202,000        | 177,572       |                    | 202,600                                         |
| Crops                        | 16,853 [Cereal 6067, Meadow 1077] |                  |                | 43,152        |                    | 25,000                                          |
| Meadows                      |                                   |                  |                | 34,976        |                    |                                                 |
| Uncultivated                 |                                   |                  |                | 21,549        |                    | 27,900                                          |
| Total                        | 305,500                           |                  |                |               |                    | 305,500                                         |
| Livestock in number of heads |                                   |                  |                |               |                    |                                                 |
| Bovines                      | 13,055                            |                  | 12,600         |               |                    | 19,644 [Tende 15 cattle pen, La Brigue 1]       |
| Sheep                        | 119,360                           |                  | 56,000         |               |                    | 119,000 [Tende & La Brigue 64,407]              |
| Sheep & goat                 |                                   |                  |                |               |                    |                                                 |
| Goat                         | 36,610                            |                  | 120,000        |               |                    | 33,268                                          |

**Table S3:** Economy of the Roya Valley during the 19<sup>th</sup> century [43-44, 55]. Realization: M. Cohen

|                 | Number of inhabitants | Surface in km <sup>2</sup> | Number of Mills | Ovens | Hay In Qx | Horses | Mules | Donkey | Cows  | Sheep, goat |
|-----------------|-----------------------|----------------------------|-----------------|-------|-----------|--------|-------|--------|-------|-------------|
| Moulinet        | 1,170                 | 41.07                      | 4               | 2     |           |        | 3     | 18     | 400   | 3000        |
| Breil-sur-Roya  | 2,700                 | 81.31                      | 10              | 9     | 2,800     | 10     | 42    | 143    | 250   | 1200        |
| Sospel          | 3,900                 | 62.48                      |                 | 11    |           | 8      | 50    | 85     |       |             |
| Saorge          | 1,990                 | 86.78                      | 8               | 3     | 8,000     |        | 25    | 120    | 1,200 | 10,000      |
| Fontan          | 1,040                 | 49.61                      | 1               | 3     | 1,500     |        | 9     | 10     |       |             |
| Berghe, Granile | 900                   |                            | 1               | 1     | 1,000     |        |       | 15     |       | 2,000       |
| Tende           | 2,900                 | 177.47                     | 2               | 5     | 6,000     | 6      | 50    | 180    |       | 1,300       |
| La Brigue       | 4,000                 | 141.99                     | 2               | 5     | 9,000     |        | 65    | 290    |       | 25,000      |

**Table S4:** Land-use changes at the turn of the 20<sup>th</sup> century in the Maritime Alps (excluding Tende and La Brigue) [45]. Realization: M. Cohen

| Unit     | Land use           | Maritime Alps |         |         | Highlands | Midlands | Roya |
|----------|--------------------|---------------|---------|---------|-----------|----------|------|
|          |                    | 1892          | 1913    | 1929    | 1929      | 1929     | 1929 |
| Ha.      | Cereals            | 26,037        | 17,690  | 5,467   |           |          |      |
|          | Olive              | 19,682        | >15,000 | 11,942  |           |          |      |
|          | Chestnut           |               |         | >900    |           |          |      |
|          | Meadows            |               |         | 11,718  |           |          |      |
|          | Reforestation      |               |         |         |           |          | 104  |
| Number   | Fig trees          |               |         | 105,500 |           |          |      |
|          | Apple trees        |               |         | 72,000  |           |          |      |
|          | Traditional hives  | 6,000         |         | 3,120   |           |          |      |
|          | Modern hives       |               |         | 5,191   | 1,298     |          |      |
|          | Heads of livestock | 184,340       | 156,060 | 111,990 |           |          |      |
| Yield Kg | Lavender           |               |         |         |           | 4,000    |      |

**Figure S1:** Detection of terraces and land-use with different sources

|                                                                                                                                                                                    |                                                                                      |
|------------------------------------------------------------------------------------------------------------------------------------------------------------------------------------|--------------------------------------------------------------------------------------|
| 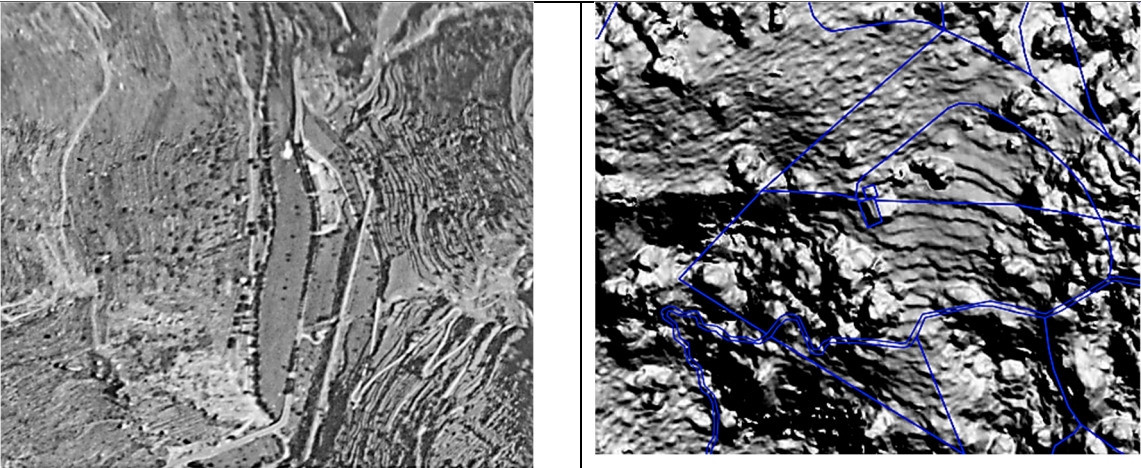                                                                                                 |                                                                                      |
| Terraces detected by aerial photography in 1947-51 (left) and Lidar “ground” (right, terraces occupy part of the plot of land in blue). Source IGN Realization: T. LeVot, M. Cohen |                                                                                      |
|                                                                                                  |   |
| Vine terraces in La Brigue                                                                                                                                                         | Intercropping on terraces in Saorge                                                  |
|                                                                                                 |  |
| Tree-cropping on terraces, Breil-sur-Roya                                                                                                                                          | Intercropping in the Ceva valley                                                     |
| Source: Bergonio map (1680). Realization: M. Cohen                                                                                                                                 |                                                                                      |

|                                                                                                                                                |                                                                                                                                                                                                                                                                                        |
|------------------------------------------------------------------------------------------------------------------------------------------------|----------------------------------------------------------------------------------------------------------------------------------------------------------------------------------------------------------------------------------------------------------------------------------------|
|                                                              |                                                                                                                                                                                                      |
| <p>Tree-cropping (Piena, Breil-sur-Roya), 1750</p>                                                                                             | <p>Intercropping on terraces (right bank) and herbaceous crops (left bank) (Breil-sur-Roya), 1750</p>  <p>Letters "c", Bc and "B" corresponding to crops, intercropped and woods in Tende, 1850</p> |
| <p>Source: Bourcet map (1750, Archives militaires de Vincennes) and Topographic map (1850, Military school Library). Realization: M. Cohen</p> |                                                                                                                                                                                                                                                                                        |
